# Supplementary material
Source: PubMed Central journal article supplement (PMC6715291)

# Supplemental Figure 1.

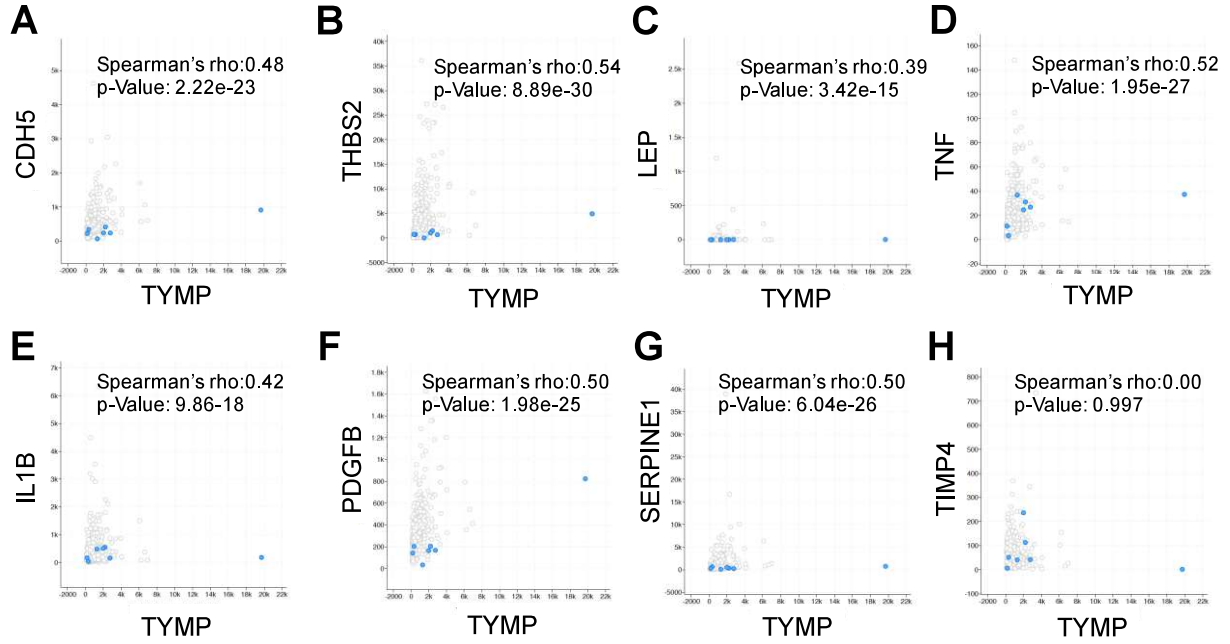

Supplement: NIHMS1042175-supplement-fig_1.pdf [file NIHMS1042175-supplement-fig_1.pdf]
